# Supplementary material for: Determination of the partition coefficient of isoquinoline alkaloids from Chelidonium majus by reversed phase thin layer chromatography
Source: Royal Society of Chemistry journal article supplement (doi:10.1039/d0nj00307g), 2020-01-01
Supplement: d0nj00307g1.pdf [file d0nj00307g1.pdf]

**Determination of partition coefficient of isoquinoline alkaloids from *Chelidonium Majus*  
by reversed phase thin layer chromatography**

Aleksandra Czeszak, Matylda Resztak, Andrzej Czyski, Izabela Nowak

**SUPPLEMENTARY INFORMATION**

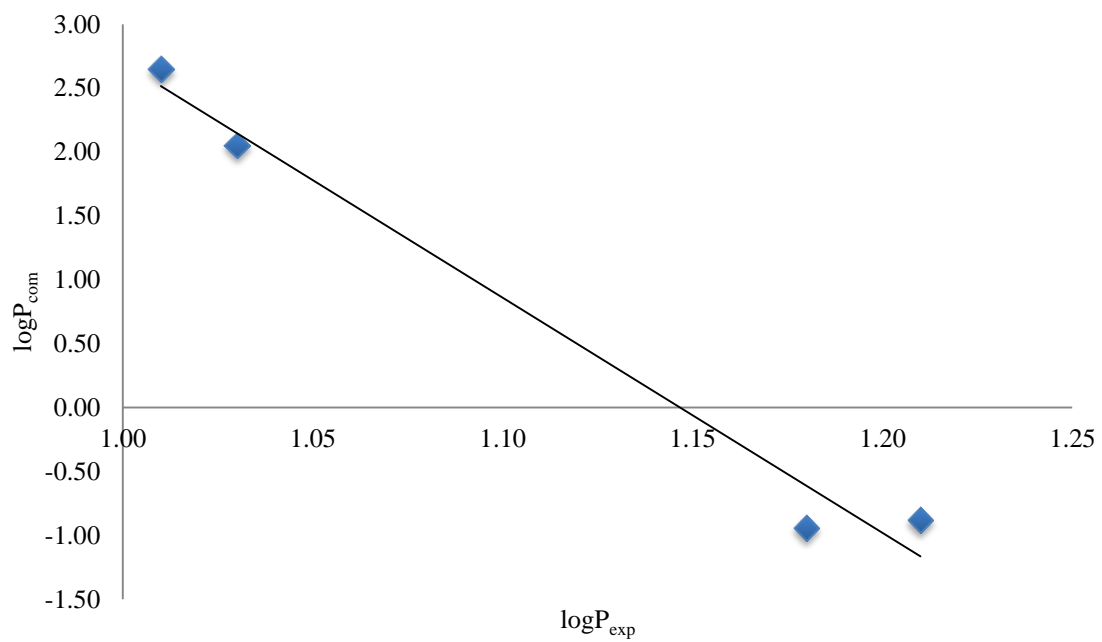

Fig. S1. The correlation between the experimental and computed  $\log P$  at  $\text{pH} = 3.0$  of the analysed compounds by ChemAxon software.
